# Supplementary material for: Optimum Contact Configurations for Quasi-One-Dimensional Phosphorene Nanodevices
Source: MDPI journal article supplement (doi:10.3390/nano13111759), 2023-05-29
Supplement: s1 [file s1]

Supplementary Materials

# Optimum contact configurations for quasi-one-dimensional phosphorene nanodevices

Mirko Poljak\* and Mislav Matic

Computational Nanoelectronics Group, Faculty of Electrical Engineering and Computing, University of Zagreb, HR 10000 Zagreb, Croatia

\* Correspondence: mirko.poljak@fer.hr

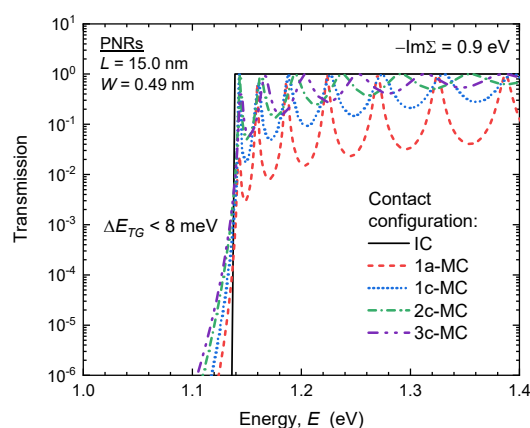

**Figure S1.** Transmission of ~15 nm-long and 0.49 nm-wide PNRs with different metal contact configurations. In the narrowest PNRs, only a very weak transport gap decrease ( $\Delta E_{TG} < 8$  meV) is observed even for the longest top contacts considered (3c-MC case). Device with edge contacts (1a-MC) suffers from the strongest transmission decrease near the conduction band minimum.

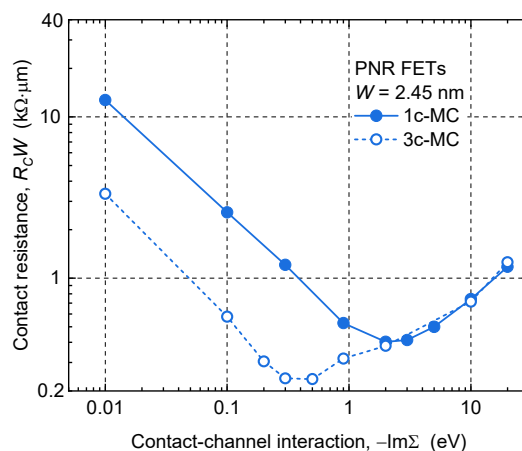

**Figure S2.** Influence of contact configuration (1c-MC vs. 3c-MC) and contact-channel interaction ( $-\text{Im}\Sigma$ ) on  $R_c$  for PNR FETs with the 2.45 nm-wide nanoribbon channel. These characteristics agree with those reported in the main text for other PNR widths, indicating a common optimum  $-\text{Im}\Sigma$  for all quasi-1D phosphorene structures.

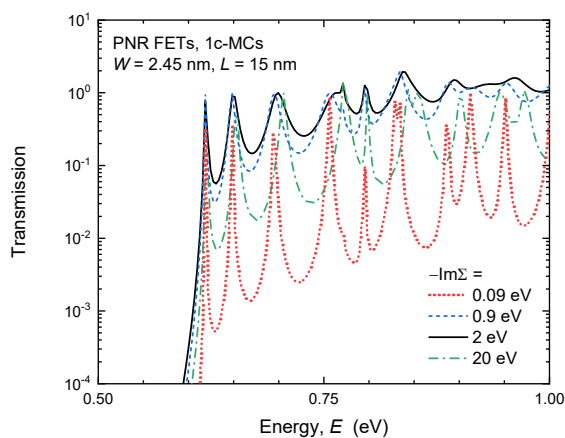

**Figure S3.** Transmission of 15 nm-long and 2.45 nm-wide PNRs with 1c-MCs with various  $-\text{Im}\Sigma$  values ranging from 0.09 eV to 20 eV. For moderate self-energy values (i.e.  $\sim 1$  eV to 2 eV) the transmission curves are very similar, while transmission probability significantly deteriorates when  $-\text{Im}\Sigma$  either increases or decreases.

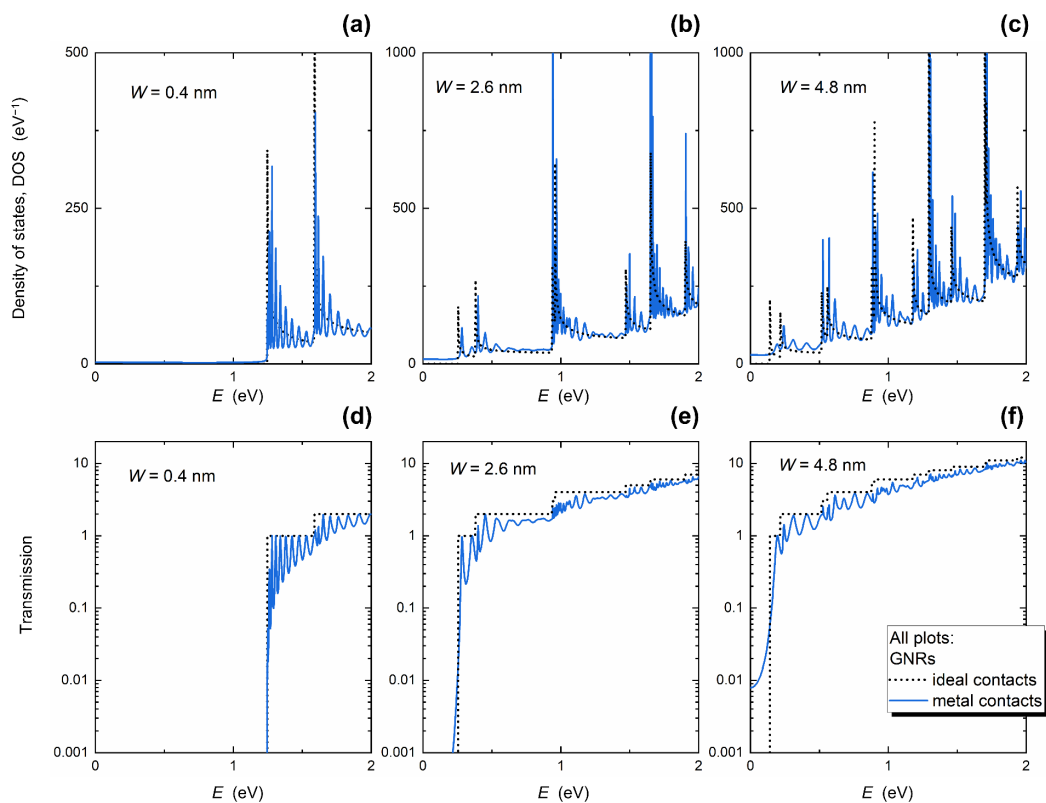

**Figure S4.** Impact of 1c-MCs on (a)–(c) DOS and (d)–(f) transmission of  $\sim 15$  nm-long GNRs with different widths in the range from  $\sim 0.4$  nm to  $\sim 4.8$  nm. Metal contacts introduce Lorentzian oscillations into DOS and transmission, and MIGs inside the bandgap that increase as nanoribbon width increases. In contrast to PNRs, transport gap in wider GNRs is not preserved because the transmission inside the bandgap increases due to MC-induced broadening.

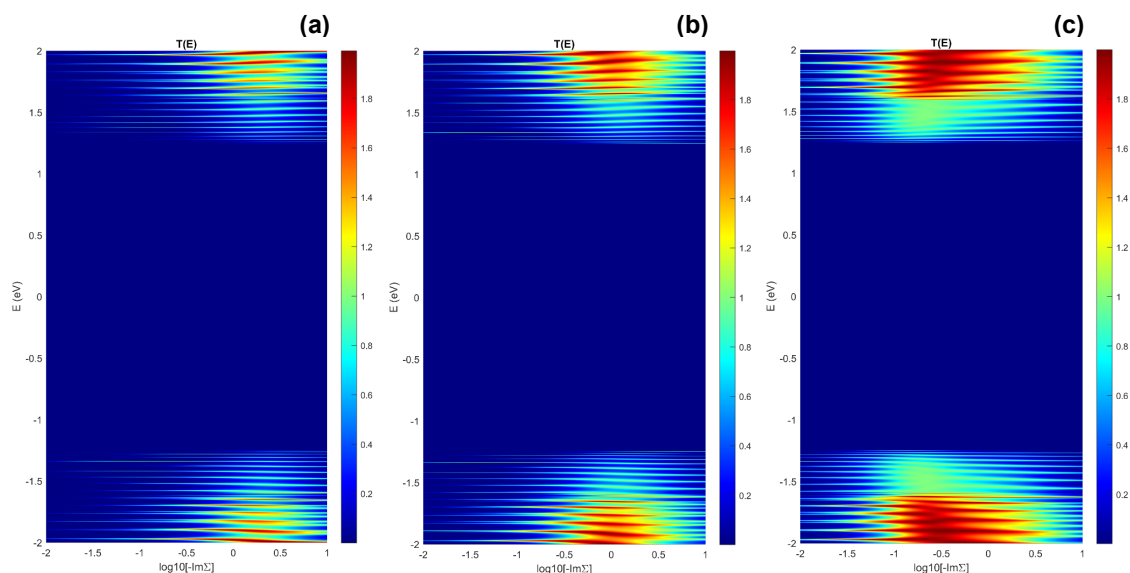

**Figure S5.** Impact of changing  $-\text{Im}\Sigma$  from  $10^{-2}$  eV to  $10^1$  eV on the transmission of  $\sim 15$  nm long and  $\sim 0.4$  nm-wide GNRs with the following contact configurations: (a) 1a-MC or edge contacts, (b) 1c-MC, and (c) 3c-MC. When the top contact length increases, optimum interaction parameter  $-\text{Im}\Sigma$  moves towards lower values, exactly as in the case of PNRs, which indicates the generality of conclusions listed in the main text about optimum metal contact configurations for 1D and quasi-1D nanostructures of 2D materials.

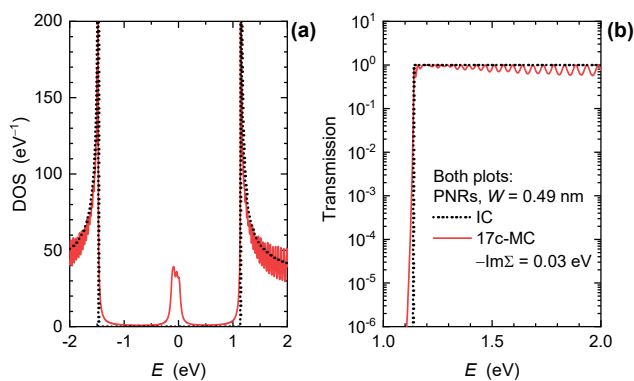

**Figure S6.** (a) DOS and (b) transmission of the 0.49 nm-wide PNR with 17c-MCs and metal-channel interaction parameter equal to 0.03 eV. The MIGS are induced inside the bandgap, as shown in (a), but these states are clearly localized and do not contribute to transport, as visible from the exceptionally low transmission probability inside the bandgap in (b). The transmission is high near the conduction band minimum, which benefits transport across the PNR and results in low  $R_c$ , as discussed in the main text.

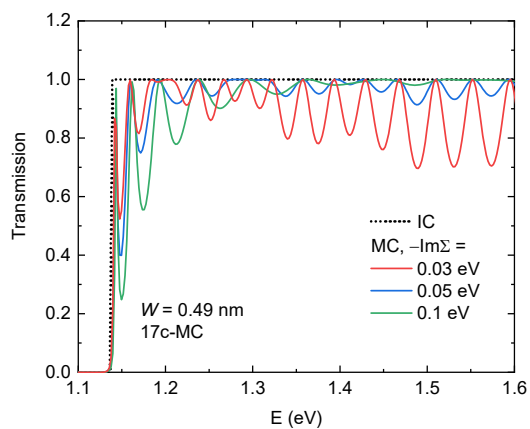

**Figure S7.** Transmission of the 0.49 nm-wide PNR with 17c-MCs for different metal-channel interaction parameters between 0.03 eV and 0.1 eV. Increasing  $-\text{Im}\Sigma$  improves the transmission only at high energies, far away from the conduction band minimum, while it decreases the transmission near the minimum, where it negatively impacts the overall device performance and  $R_c$  the most.
